# Supplementary material for: In situ preparation of highly luminescent Sb3+/Mn2+ co-doped Cs2KInCl6 lead-free double perovskites in a PVDF matrix and application to white light emitting diodes and anti-counterfeiting
Source: Royal Society of Chemistry journal article supplement (doi:10.1039/d4tc03527e), 2024-01-01
Supplement: d4tc03527e1.pdf [file d4tc03527e1.pdf]

## SUPPORTING INFORMATION

### **In situ preparation of highly luminescent Sb<sup>3+</sup>/Mn<sup>2+</sup> co-doped Cs<sub>2</sub>KInCl<sub>6</sub> lead-free double perovskite in PVDF matrix and application to white light emitting diode and anti-counterfeiting**

Yongrun Dong,<sup>a</sup> Wen Li,<sup>a</sup> Tao Huang,<sup>a</sup> Shuaigang Ge,<sup>b</sup> Linghang Kong,<sup>a</sup> Chuang Ning,<sup>a</sup> Zequan Li,<sup>\*a</sup> Wei Gao<sup>\*a</sup> and Bingsuo Zou<sup>\*a</sup>

<sup>a</sup>State Key Laboratory of Featured Metal Materials and Life-cycle Safety for Composite Structures, MOE Key Laboratory of New Processing Technology for Nonferrous Metals and Materials, and School of Resources, Environment and Materials, Guangxi University, Nanning 530004, China.

<sup>b</sup>School of Physical Science and Technology, Guangxi University, Nanning 530004, China.

\*Email: zequan@gxu.edu.cn (Zequan Li), galaxy@gxu.edu.cn (Wei Gao), zoubs@gxu.edu.cn (Bingsuo Zou)

**Table S1.** The positions, PL intensities, FWHM and CIE coordinates of the dual peaks in different regions of the Cs<sub>2</sub>KInCl<sub>6</sub>/PVDF composite film with Mn to Sb ratio of 16:1.

| Positio<br>n | Peak1<br>wavelength<br>(nm) | Peak1 PL<br>intensity | Peak2<br>Wavelength<br>(nm) | Peak2 PL<br>intensity | FWHM     | CIE              |
|--------------|-----------------------------|-----------------------|-----------------------------|-----------------------|----------|------------------|
| 1            | 501                         | 906059.1              | 633                         | 702325.1              | 230.6416 | (0.3357, 0.3833) |
| 2            | 500                         | 943006.4              | 634                         | 724365.4              | 232.7982 | (0.3333, 0.3800) |
| 3            | 501                         | 953537.7              | 634                         | 775487.4              | 231.0202 | (0.3396, 0.3822) |
| 4            | 501                         | 1008074.3             | 634                         | 835016.5              | 229.9310 | (0.3415, 0.3832) |
| 5            | 501                         | 1028279.9             | 634                         | 862647.2              | 232.2089 | (0.3424, 0.3825) |
| 6            | 501                         | 1054715.6             | 633                         | 839332.0              | 230.0910 | (0.3380, 0.3830) |
| 7            | 500                         | 1066223.9             | 634                         | 887090.8              | 232.7456 | (0.3399, 0.3779) |
| 8            | 500                         | 1070569.8             | 634                         | 852467.1              | 231.8963 | (0.3360, 0.3793) |
| 9            | 500                         | 1071127.5             | 633                         | 875282.5              | 231.1717 | (0.3388, 0.3801) |
| 10           | 500                         | 1075901.7             | 633                         | 886219.9              | 234.4710 | (0.3398, 0.3801) |
| 11           | 501                         | 1096263.9             | 633                         | 881045.3              | 230.9752 | (0.3388, 0.3830) |
| 12           | 501                         | 1096271.3             | 632                         | 932813.7              | 232.2579 | (0.3441, 0.3833) |
| 13           | 501                         | 1104425.1             | 632                         | 898658.9              | 232.8296 | (0.3390, 0.3806) |
| 14           | 502                         | 1137986.1             | 634                         | 952250.0              | 232.7614 | (0.3438, 0.3849) |
| 15           | 501                         | 1142087.1             | 632                         | 903584.3              | 230.7596 | (0.3379, 0.3834) |
| 16           | 501                         | 1181506.1             | 634                         | 981440.0              | 232.5075 | (0.3395, 0.3791) |

**Table S2.** Weight percentage and atomic percentage of partial relevant elements in Cs<sub>2</sub>KInCl<sub>6</sub>/PVDF composite film with Mn to Sb ratio of 16:1.

| Element | Weight % | Atomic % |
|---------|----------|----------|
| F (K)   | 85.93    | 94.92    |
| Cs (L)  | 4.00     | 0.63     |
| K (K)   | 0.83     | 0.45     |
| In (L)  | 2.17     | 0.40     |
| Cl (K)  | 5.08     | 3.01     |
| Sb (L)  | 0.80     | 0.14     |
| Mn (K)  | 1.18     | 0.45     |

**Table S3.** Bi-exponential fitting results of decay curves for  $\text{Sb}^{3+}/\text{Mn}^{2+}$  co-doped  $\text{Cs}_2\text{KInCl}_6/\text{PVDF}$  composite films

| <b>Mn to Sb<br/>ratio</b> | <b><math>A_1</math> (%)</b> | <b><math>\tau_1</math> (ms)</b> | <b><math>A_2</math> (%)</b> | <b><math>\tau_2</math> (ms)</b> | <b><math>\tau_{\text{ave}}</math> (ms)</b> |
|---------------------------|-----------------------------|---------------------------------|-----------------------------|---------------------------------|--------------------------------------------|
| 8:1                       | 0.248                       | 2.558                           | 0.721                       | 15.813                          | 15.114                                     |
| 12:1                      | 0.265                       | 1.062                           | 0.651                       | 14.522                          | 14.134                                     |
| 16:1                      | 0.294                       | 3.689                           | 0.621                       | 16.155                          | 14.941                                     |
| 20:1                      | 0.388                       | 1.310                           | 0.533                       | 14.759                          | 13.944                                     |

**Table S4.** Comparison of optical properties of the other perovskite/polymer composite films by in situ strategy.

| <b>Composite film</b>                                                                    | <b>Color</b> | <b>PLQY (%)</b> | <b>Ref</b>       |
|------------------------------------------------------------------------------------------|--------------|-----------------|------------------|
| MAPbBr <sub>3</sub> /PVDF                                                                | green        | 94.6            | 1                |
| CsPbBr <sub>3</sub> /PVDF                                                                | green        | 65              | 2                |
| Mn <sup>2+</sup> doped MAPbCl <sub>3</sub> /PVDF                                         | red          | 22.8            | 3                |
| MAPbBr <sub>3</sub> /pHEA                                                                | green        | 11              | 4                |
| MAPbBr <sub>3</sub> /PAN                                                                 | green        | 71              | 5                |
| MAPbBr <sub>3</sub> /PVA                                                                 | green        | 95.3            | 6                |
| Cd <sup>2+</sup> doped FAPbBr <sub>3</sub> /PVDF                                         | green        | 74.4            | 7                |
| Cs <sub>3</sub> Cu <sub>2</sub> I <sub>5</sub> /PMMA                                     | blue         | 64              | 8                |
| Cs <sub>2</sub> Na <sub>0.8</sub> Ag <sub>0.2</sub> BiCl <sub>6</sub> /PMMA              | orange       | 21.52           | 9                |
| <b>Sb<sup>3+</sup>/Mn<sup>2+</sup> co-doped<br/>Cs<sub>2</sub>KInCl<sub>6</sub>/PVDF</b> | <b>white</b> | <b>86.98</b>    | <b>This work</b> |

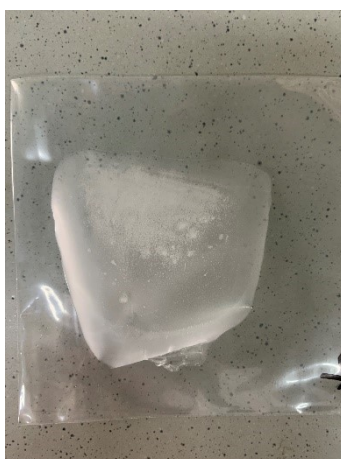

**Fig. S1** The photograph of  $\text{Cs}_2\text{KInCl}_6/\text{PVDF}$  composite film with Mn to Sb ratio of 16:1 obtained by direct heating at  $100^\circ\text{C}$  under sunlight.

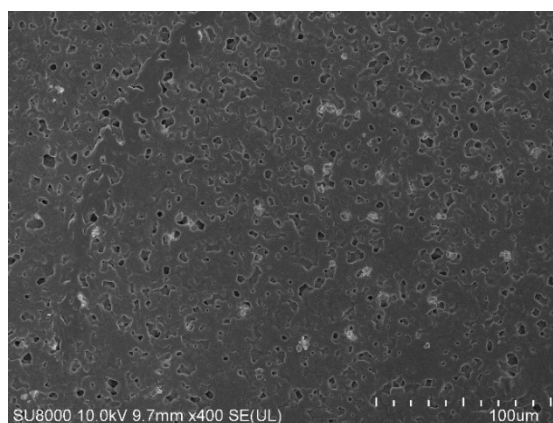

**Fig. S2** SEM image of  $\text{Cs}_2\text{KInCl}_6/\text{PVDF}$  composite film with Mn to Sb ratio of 16:1 obtained by direct heating at  $100^\circ\text{C}$ .

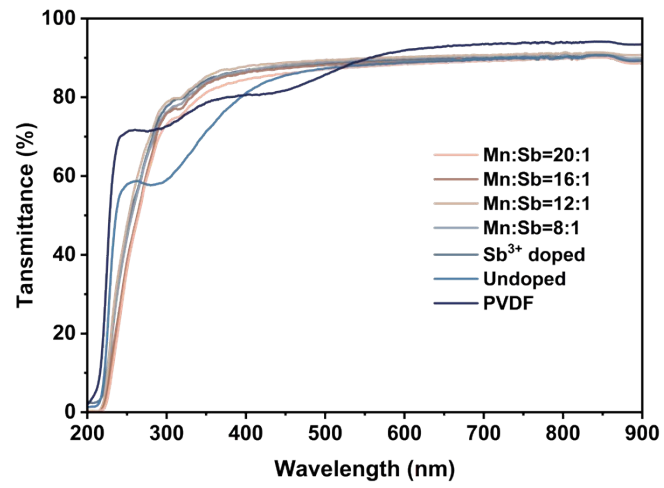

**Fig. S3** Transmission spectrum of pure PVDF film and composite films.

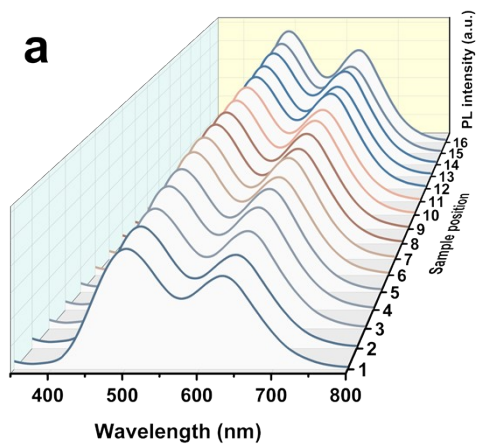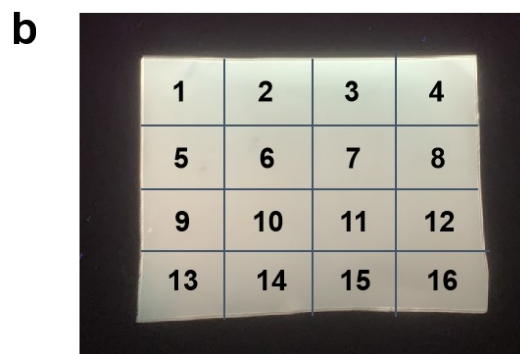

**Fig. S4** PL spectra of different regions of the  $\text{Cs}_2\text{KInCl}_6/\text{PVDF}$  composite film with Mn to Sb ratio of 16:1.

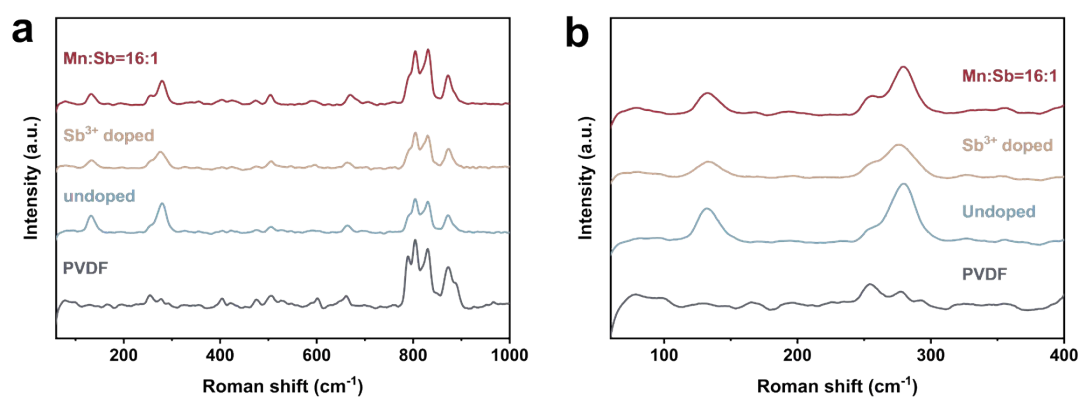

**Fig. S5** (a) Raman spectrum of pure PVDF film, undoped, Sb<sup>3+</sup> doped and co-doped Cs<sub>2</sub>KInCl<sub>6</sub>/PVDF composite films. (b) Raman spectrum of pure PVDF film, undoped, Sb<sup>3+</sup> doped and co-doped Cs<sub>2</sub>KInCl<sub>6</sub>/PVDF composite films at 50 and 400 cm<sup>-1</sup>.

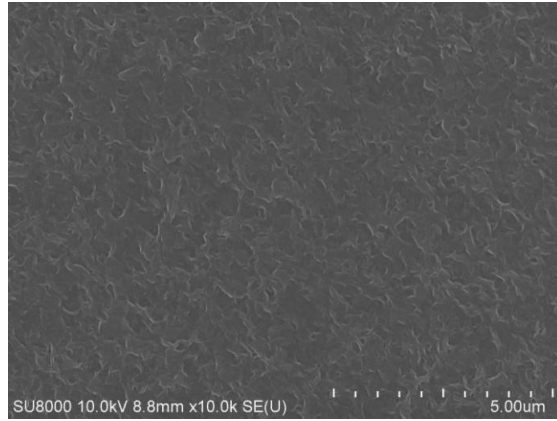

**Fig. S6** SEM image of pure PVDF film.



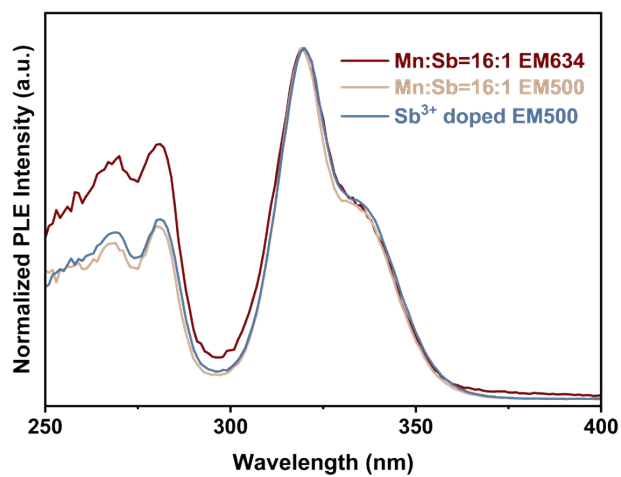

**Fig. S7** PLE spectra of  $\text{Cs}_2\text{KInCl}_6/\text{PVDF}$  composite films with single  $\text{Sb}^{3+}$  doped and co-doped.

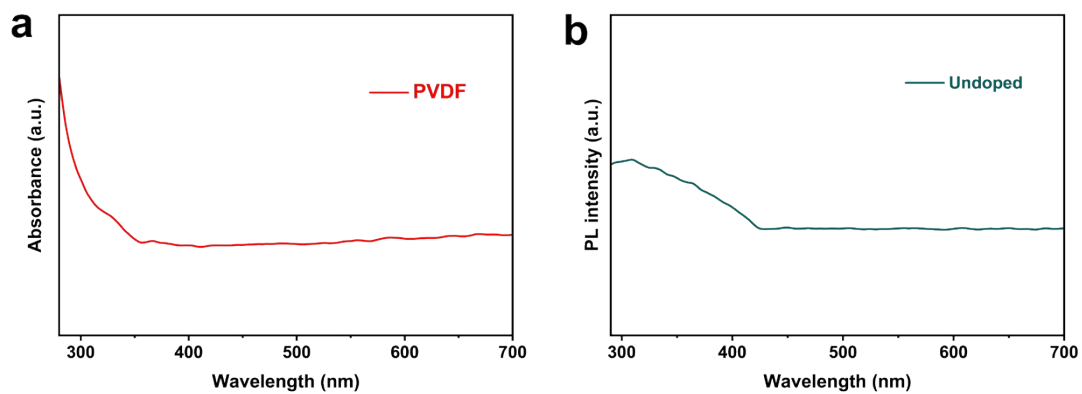

**Fig. S8** (a) and (b). Absorption spectrum of pure PVDF film and  $\text{Cs}_2\text{KInCl}_6/\text{PVDF}$  composite film.

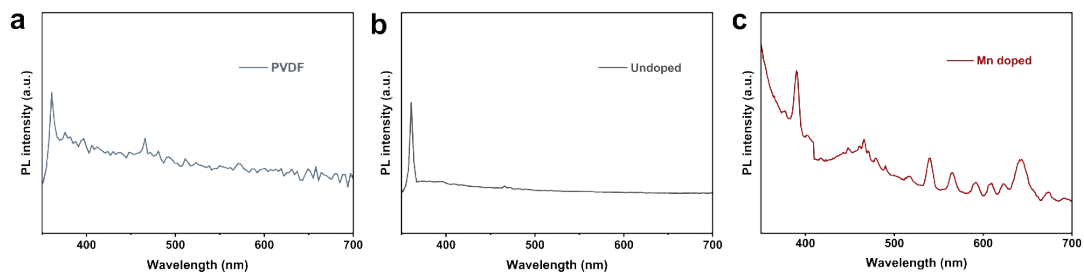

**Fig. S9** (a), (b) and (c). PL spectrum of pure PVDF film,  $\text{Cs}_2\text{KInCl}_6/\text{PVDF}$  composite film and  $\text{Mn}^{2+}$  doped  $\text{Cs}_2\text{KInCl}_6/\text{PVDF}$  composite film.

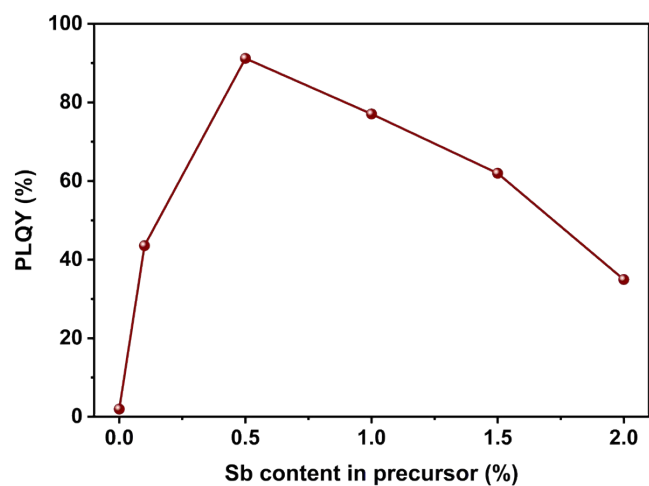

**Fig. S10** PLQY of Cs<sub>2</sub>KInCl<sub>6</sub>/PVDF composite films with different Sb content in precursor.

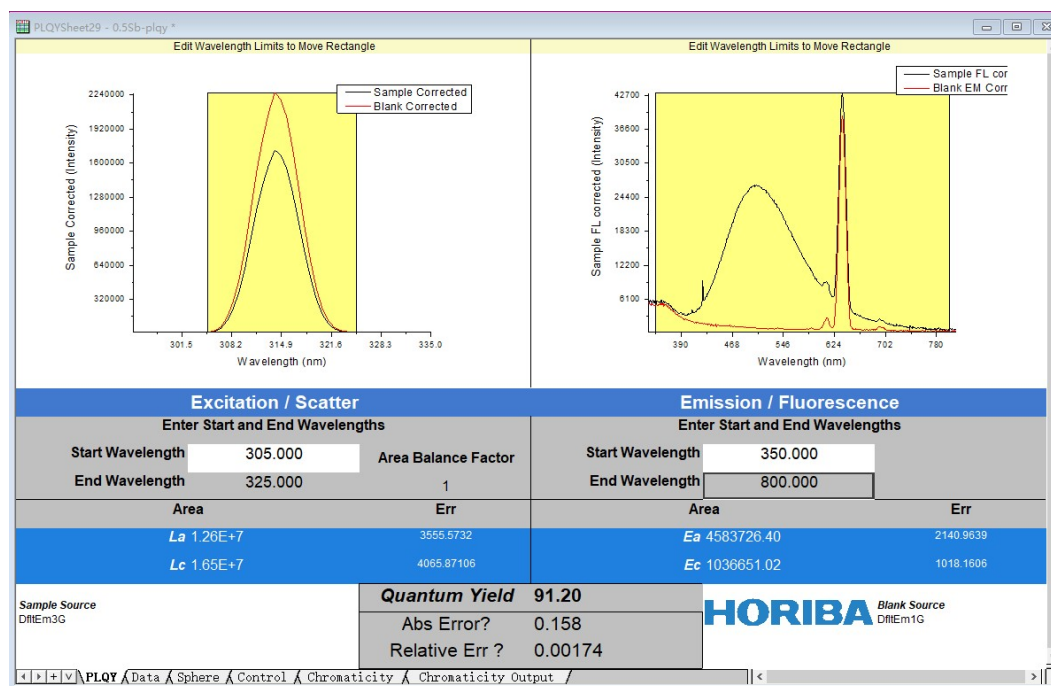

**Fig. S11** PLQY of 0.5%Sb: Cs<sub>2</sub>KInCl<sub>6</sub>/PVDF composite film.

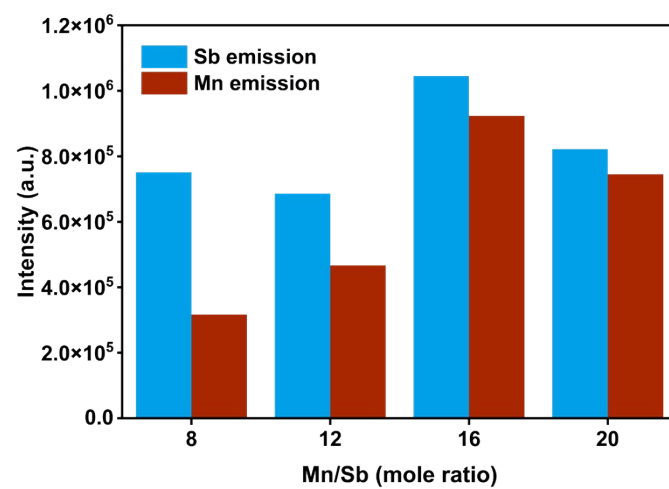

**Fig. S12** PL intensity of  $\text{Cs}_2\text{KInCl}_6/\text{PVDF}$  composite films with different Mn/Sb feeding ratio.

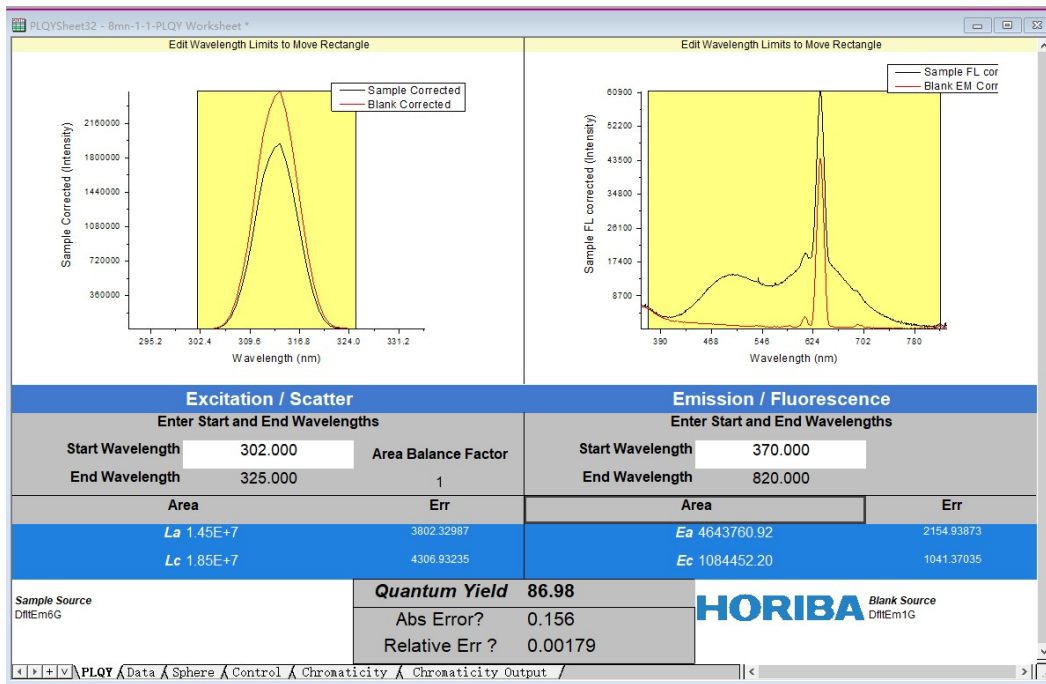

**Fig. S13** PLQY of Cs<sub>2</sub>KInCl<sub>6</sub>/PVDF composite film with Mn to Sb ratio of 16:1.

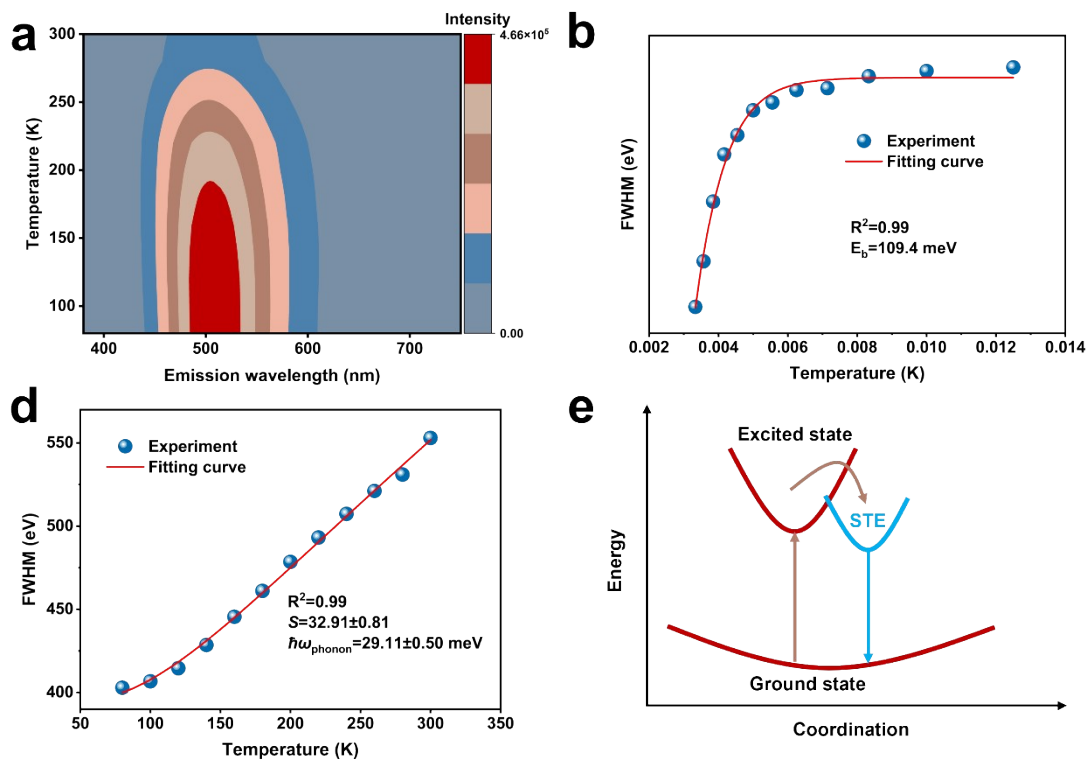

**Fig. S14** (a) Pseudo-color maps of temperature-dependent PL spectra of the  $\text{Sb}^{3+}$  doped  $\text{Cs}_2\text{KInCl}_6/\text{PVDF}$  composite film ( $\lambda_{\text{ex}}=320\text{nm}$ ). And its corresponding (b) PL intensity versus  $1/T$  and fitting results. (c) Fwhm versus temperature and the fitting results. (d) Schematic diagram of photophysical processes.

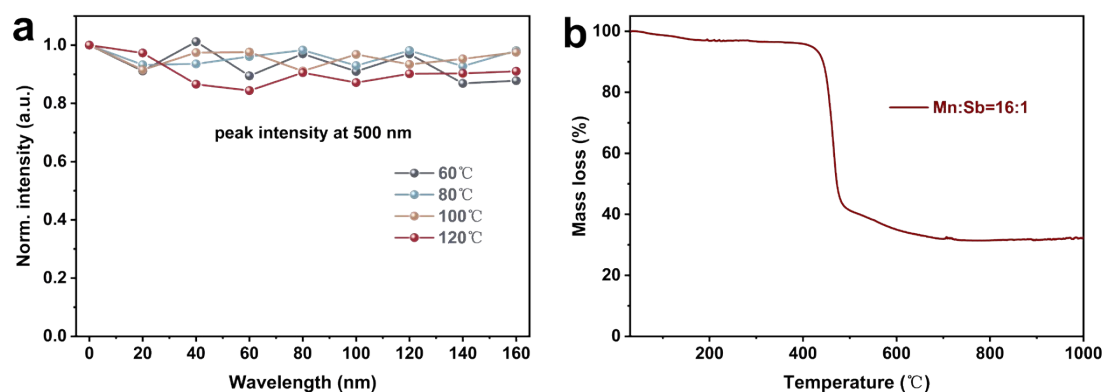

**Fig. S15** (a) Stability of  $\text{Cs}_2\text{KInCl}_6/\text{PVDF}$  composite film with Mn to Sb ratio of 16:1 under heating. (b) Thermogravimetric analysis thermogram of  $\text{Cs}_2\text{KInCl}_6/\text{PVDF}$  composite film with Mn to Sb ratio of 16:1.

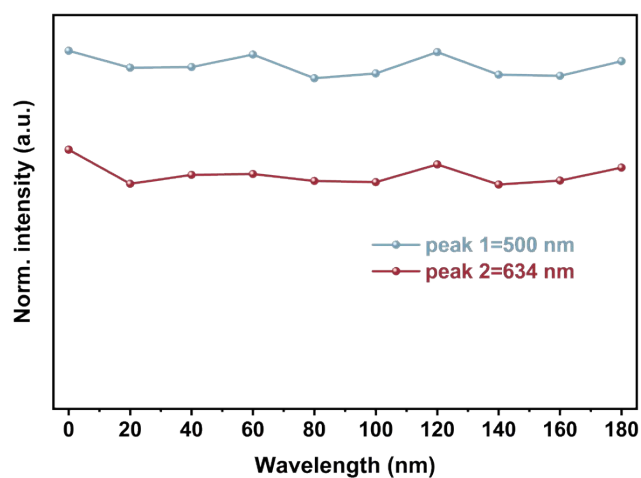

**Fig. S16** Stability of  $\text{Cs}_2\text{KInCl}_6/\text{PVDF}$  composite film with Mn to Sb ratio of 16:1 under illumination.

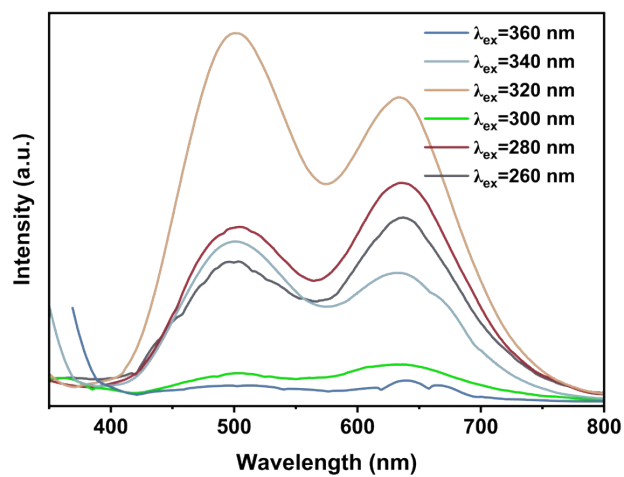

**Fig. S17** Variable excitation spectrum of  $\text{Cs}_2\text{KInCl}_6/\text{PVDF}$  composite film with Mn to Sb ratio of 16:1



## References

1. Q. C. Zhou, Z. L. Bai, W. G. Lu, Y. T. Wang, B. S. Zou and H. Z. Zhong, *Adv. Mater.*, 2016, **28**, 9163-+.
2. P. T. Liang, P. Zhang, A. Z. Pan, K. Yan, Y. S. Zhu, M. Y. Yang and L. He, *ACS Appl. Mater. Interfaces*, 2019, **11**, 22786-22793.
3. X. W. Bai, L. Q. Meng, N. Zhou, J. J. Zheng, X. F. Yu, P. K. Chu, J. J. Xiao, B. S. Zou and J. Li, *J. Colloid Interface Sci.*, 2022, **606**, 1163-1169.
4. D. R. Wang, Y. Q. Bao, J. J. Cui, L. F. Chao, L. Gu, W. Hui, Y. Shen, B. Zhang, Y. H. Chen and L. Song, *Adv. Funct. Mater.*, 2023, **33**, 10.
5. R. Cheng, Z. B. Liang, L. L. Zhu, H. Li, Y. Zhang, C. F. Wang and S. Chen, *Angew. Chem.-Int. Edit.*, 2022, **61**, 11.
6. H. Zhang, S. Cao, J. L. Jiang, Q. Sun, J. Z. Liu, D. L. Ou, J. L. Zhao, W. Y. Yang, H. Fu and J. J. Zheng, *Chem. Eng. J.*, 2023, **462**, 10.
7. J. Z. Liu, H. Fu, Z. T. Du, D. L. Ou, S. X. Li, Q. C. Chen, W. Y. Yang, J. L. Zhao and J. J. Zheng, *J. Mater. Chem. C*, 2022, **10**, 17512-17520.
8. W. Zhou, X. D. Zhu, J. Yu, D. D. Mou, H. X. Li, L. Y. Kong, T. C. Lang, L. L. Peng, W. B. Chen, X. H. Xu and B. T. Liu, *ACS Appl. Mater. Interfaces*, 2023, **15**, 38741-38749.
9. J. D. Shi, M. Q. Wang, C. Zhang, J. N. Wang, Y. Zhou, Y. L. Xu, N. V. Gaponenko and A. S. Bhatti, *ACS Appl. Mater. Interfaces*, 2023, **15**, 12383-12392.
